# Supplementary material for: Gate Tunable Transport in Graphene/MoS2/(Cr/Au) Vertical Field-Effect Transistors
Source: PubMed Central journal article supplement (PMC5791101; doi:10.3390/nano8010014), 2017-12-28
Supplement: nanomaterials-08-00014-s001.pdf [file nanomaterials-08-00014-s001.pdf]

# Supplementary Materials

## Gate Tunable Transport in Graphene/MoS<sub>2</sub>/(Cr/Au) Vertical Field-Effect Transistors

Ghazanfar Nazir <sup>1</sup>, Muhammad Farooq Khan <sup>1</sup>, Sikandar Aftab <sup>1</sup>, Amir Muhammad Afzal <sup>1</sup>, Ghulam Dastgeer <sup>1</sup>, Malik Abdul Rehman <sup>2</sup>, Yongho Seo <sup>2</sup>, and Jonghwa Eom <sup>1, \*</sup>

<sup>1</sup> Department of Physics & Astronomy and Graphene Research Institute, Sejong University, Seoul 05006, Korea; zafarforall2004@gmail.com (G.N.); muhammadfarooqkhan87@gmail.com (M.F.K.); physics.sikandar@gmail.com (S.A.); Amirafzal461@gmail.com (A.M.A.); dtedastgeer@gmail.com (G.D.)

<sup>2</sup> Department of Nanotechnology & Advanced Materials Engineering, Sejong University, Seoul 05006, Korea; malik.mann002@gmail.com (M.A.R.); yseo@sejong.ac.kr (Y.S.)

\* Correspondence: eom@sejong.ac.kr

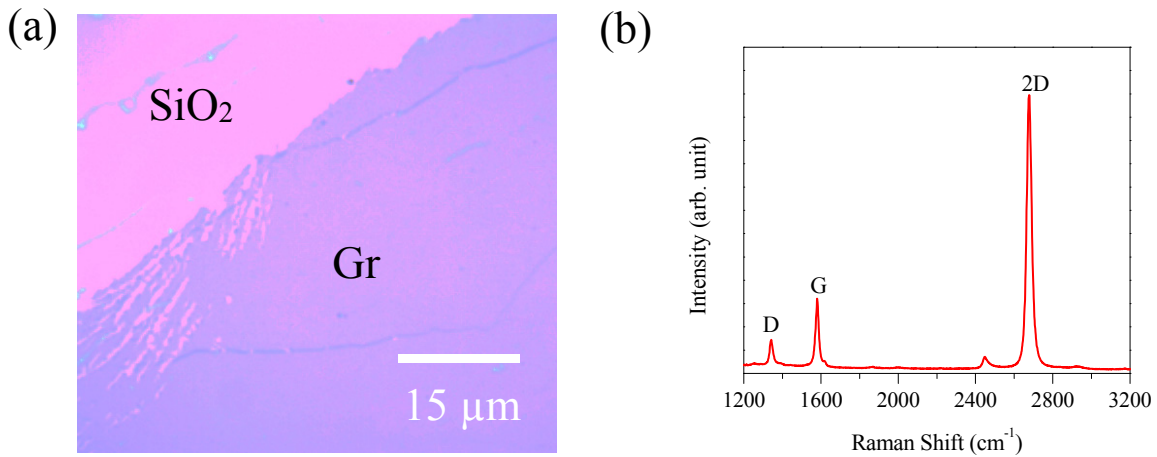

**Figure S1.** (a) An optical microscope image of monolayer graphene. (b) Raman spectra of monolayer graphene. Small D peak indicates fewer defects. The ratio of  $I_{2D}/I_G > 2$  indicates that our graphene is monolayer.

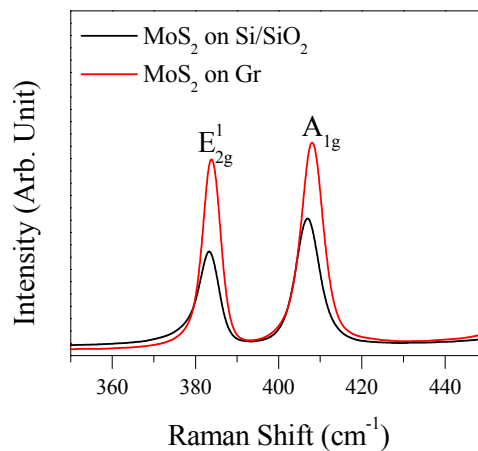

**Figure S2.** Raman spectra of MoS<sub>2</sub> on Si/SiO<sub>2</sub> substrate (black curve) and on graphene (red curve)

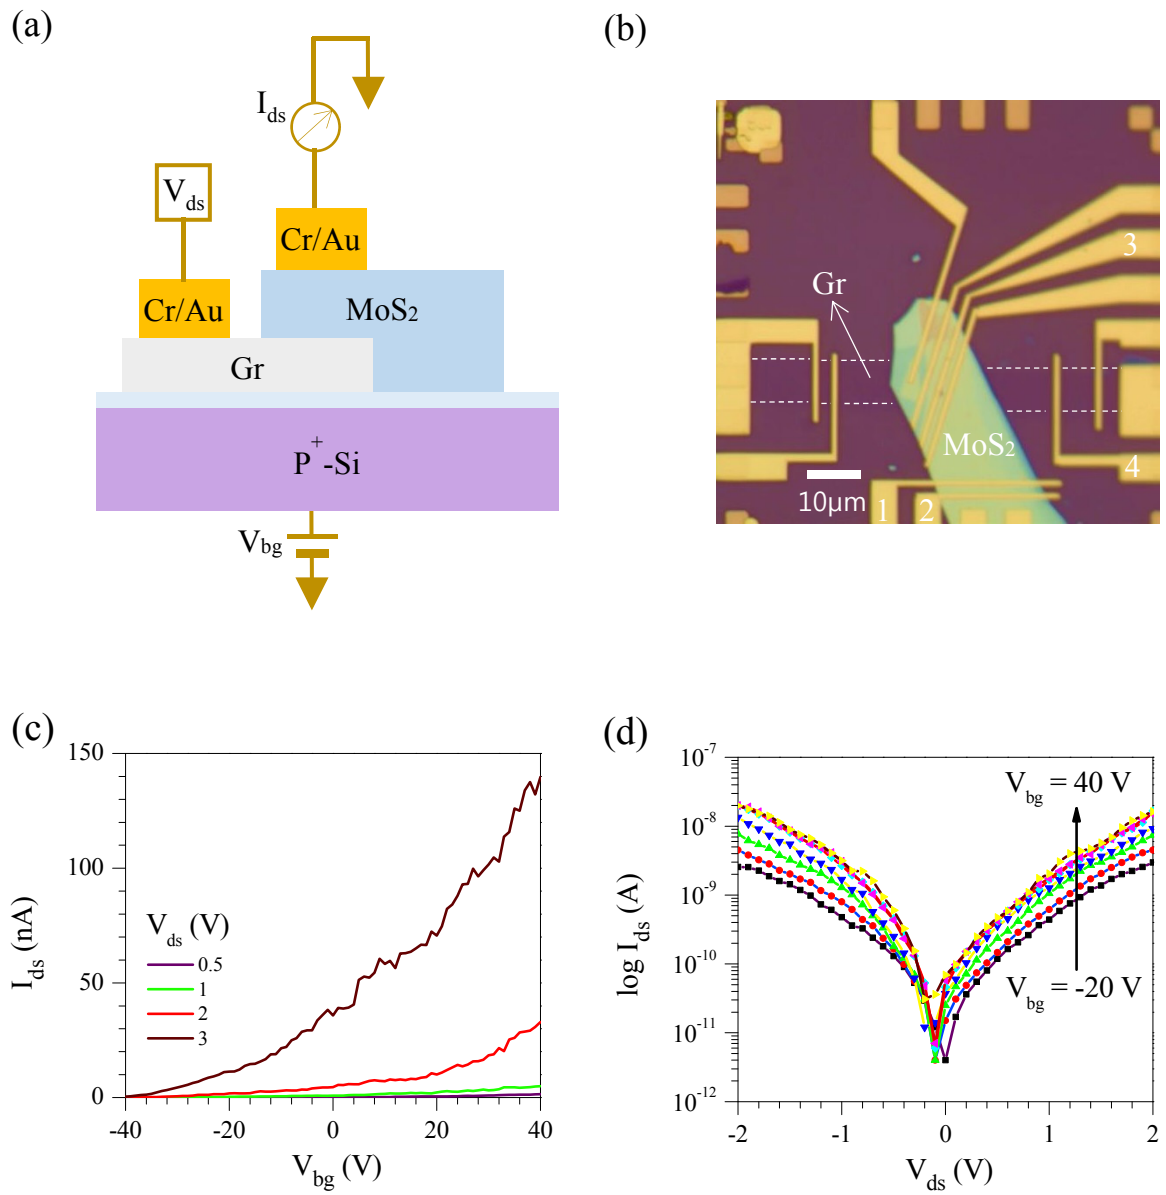

**Figure S3.** (a) Schematic diagram for Gr/MoS<sub>2</sub> device for transfer measurement. (b) Optical microscope image of Gr/MoS<sub>2</sub> device. (c) Transfer ( $I_{ds}$ - $V_{bg}$ ) curves of Gr/MoS<sub>2</sub> device at different  $V_{ds}$  measured between three and four contacts. (d) Output characteristics ( $I_{ds}$ - $V_{ds}$ ) of Gr/MoS<sub>2</sub> devices at various  $V_{bg}$  used for estimation of Schottky barrier height shown in Figs. 3(a) and (b). All measurement has performed at  $T = 300$  K.

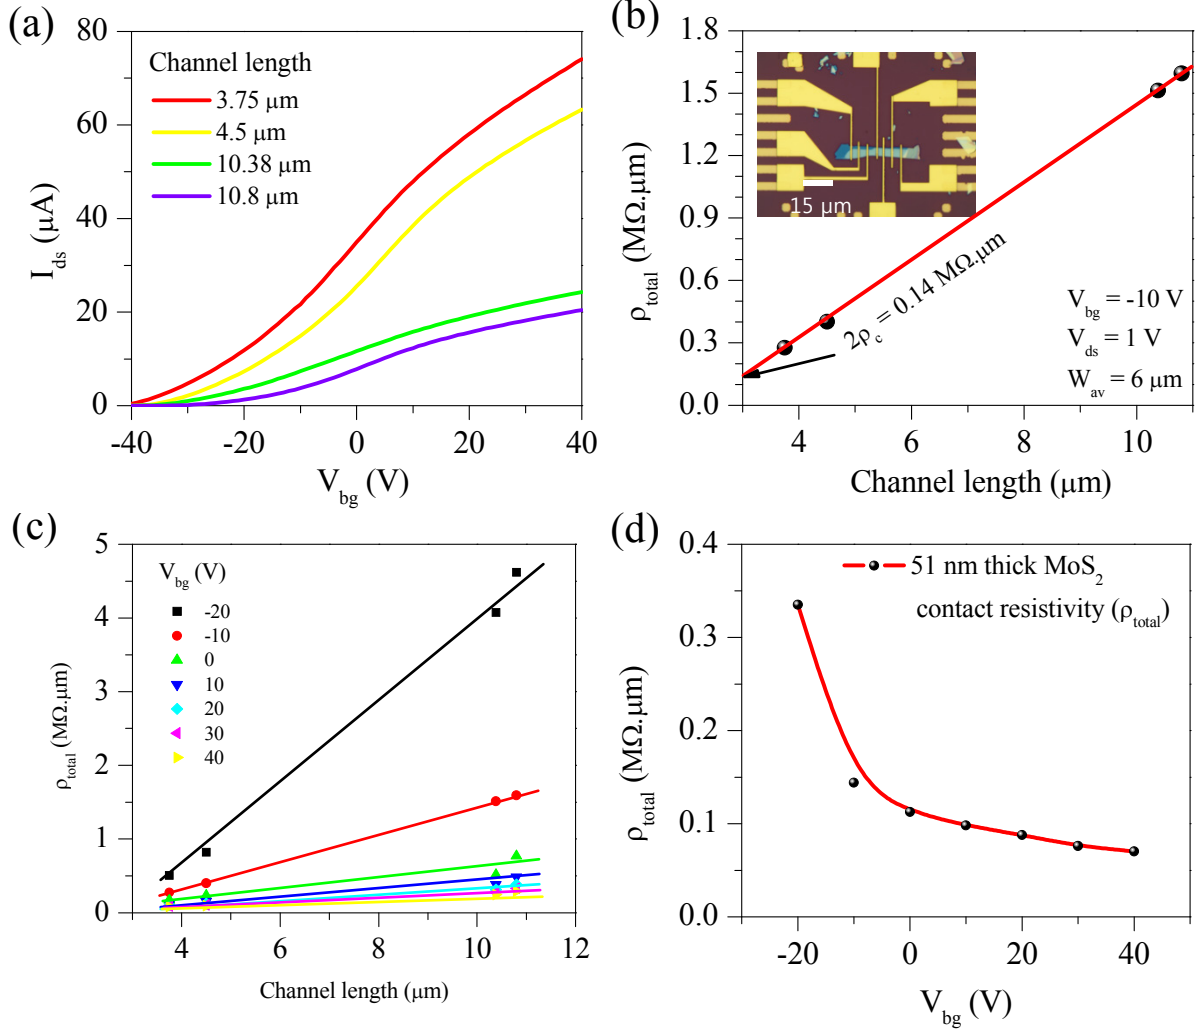

**Figure S4.** (a) Transfer curves ( $I_{ds}$ - $V_{bg}$ ) at  $V_{ds} = 1$  V for different channel length in planar geometry for 51 nm-thick MoS<sub>2</sub> flake. (b) Total resistivity as a function of channel length based on TLM method. Extracted contact resistivity was nearly 0.14  $\text{M}\Omega\cdot\mu\text{m}$ . (c) Total resistivity as a function of channel length at different  $V_{bg}$ . (d) Contact resistivity ( $\rho_c$ ) as function of  $V_{bg}$ .

In order to have rough estimate of contact resistivity, we choose a MoS<sub>2</sub> flake with thickness of ~51 nm so, it is considered as bulk material. The contact resistivity for ~51 nm-thick flake has been measured by using transmission line method (TLM) and the results are displayed in Fig. S4. Transfer curves at different channel length for thick MoS<sub>2</sub> (~51 nm) flake are presented in Fig. S4(a). We choose contact resistivity instead of contact resistance in order to compare the results easily with planar resistivity of Fig. 2(d) of the main manuscript. Here we measured total resistivity ( $\rho_{total}$ ) for different channel lengths at fixed  $V_{bg} = -10$  V and then draw the straight line connecting all these resistivity points to get the intercept of  $y$ -axis. The value of intercept of  $y$ -axis then gives us the contact resistivity based on TLM method. We choose here  $V_{bg} = -10$  V to extract contact resistivity because we measured our planar and vertical resistivity at  $V_{bg} = -10$  V, so it would be easy to compare. We note that contact resistivity (~0.14  $\text{M}\Omega \mu\text{m}$ ) is smaller than planar resistivity (~2.59  $\text{M}\Omega \mu\text{m}$ ) for 51 nm-thick MoS<sub>2</sub> flake. Therefore, difference in the contact resistivity values from the

planar resistivity is the evidence for the existence of other factors, which contributes to the total planar resistivity as we have already discussed in our main manuscript. We also include back-gate dependent contact resistivity shown in Fig. S4(c) and (d). A large contact resistivity was found at negative  $V_{bg}$ , whereas small contact resistance was observed at positive  $V_{bg}$  due to increasing carrier channels in positive back-gate region.
